# Supplementary material for: Clinically Relevant Prenatal Ultrasound Diagnosis of Umbilical Cord Pathology
Source: MDPI journal article supplement (doi:10.3390/diagnostics12020236), 2022-01-19
Supplement: s1 [file s1]

# Clinically Relevant Prenatal Ultrasound Diagnosis of Umbilical Cord Pathology

Roxana Elena Bohîlțea <sup>1,2,\*</sup>, Vlad Dima <sup>2,\*</sup>, Ioniță Ducu <sup>3</sup>, Ana Maria Iordache <sup>4,\*</sup>, Bianca Margareta Mihai <sup>2</sup>, Octavian Munteanu <sup>5</sup>, Corina Grigoriu <sup>1,3,\*</sup>, Alina Veduță <sup>2</sup>, Dimitrie Pelinescu-Onciul <sup>1</sup> and Radu Vlădăreanu <sup>1</sup>

<sup>1</sup> Department of Obstetrics and Gynecology, “Carol Davila” University of Medicine and Pharmacy Bucharest, 37 Dionisie Lupu, 020021 Bucharest, Romania; dimitriepelinescu@yahoo.com (D.P.-O.); vladareanu@gmail.com (R.V.)

<sup>2</sup> Department of Obstetrics, Gynecology and Neonatology, Filantropia Hospital, 11–13 Ion Mihalache Blv., Sector 1, 011171 Bucharest, Romania; bmmihai@gmail.com (B.M.M.); alina.veduta@gmail.com (A.V.)

<sup>3</sup> Department of Obstetrics and Gynecology, University Emergency Hospital, 169 Splaiul Independentei Bld., sector 5, 050098 Bucharest, Romania; ionitaducu@gmail.com

<sup>4</sup> Optospintronics Department, National Institute for Research and Development in Optoelectronics-INOE 2000, 409 Atomistilor, 077125 Magurele, Romania

<sup>5</sup> Department of Anatomy, “Carol Davila” University of Medicine and Pharmacy Bucharest, 37 Dionisie Lupu, 020021 Bucharest, Romania; octav\_munteanu@yahoo.com

\* Correspondence: r.bohiltea@yahoo.com (R.E.B.); dima.vlad@yahoo.com (V.D.); ana.iordache@inoe.ro (A.M.I.); corigri@gmail.com (C.G.)

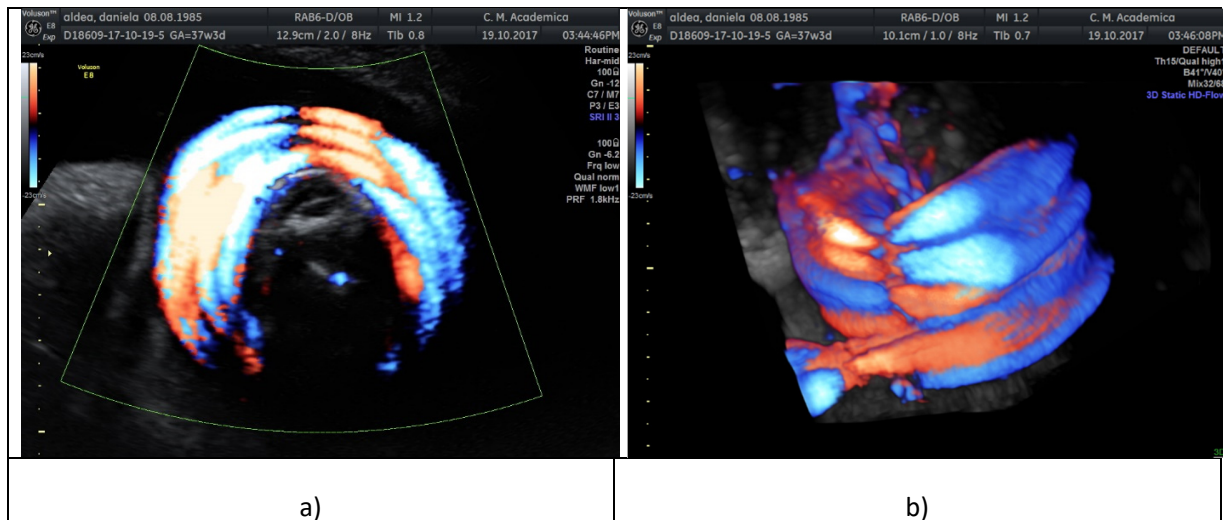

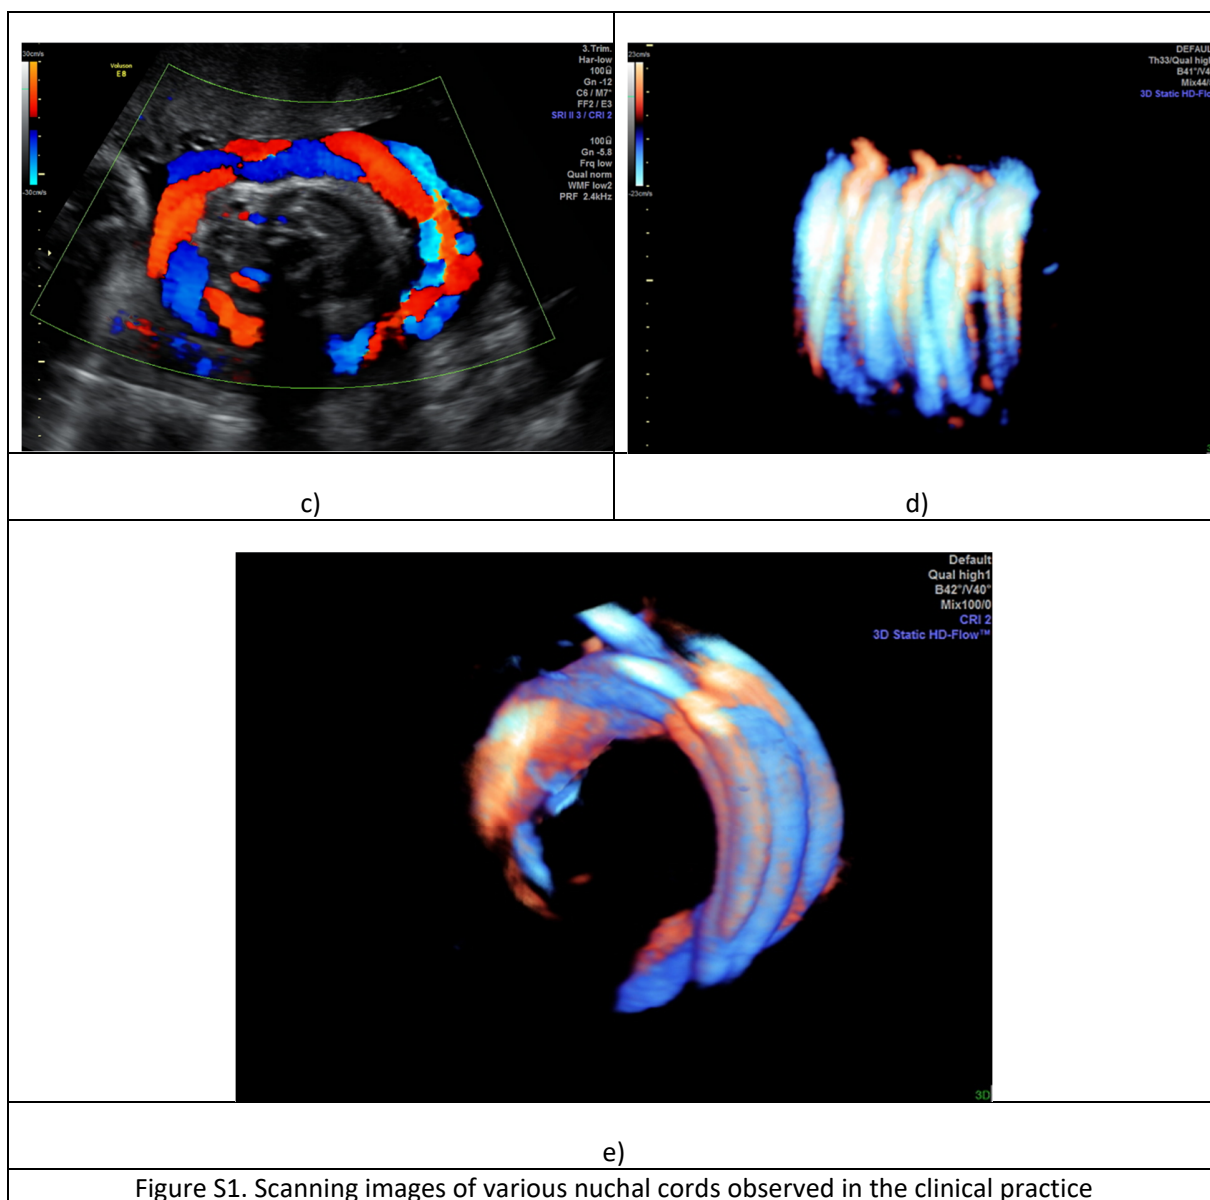

Figure S1. Scanning images of various nuchal cords observed in the clinical practice

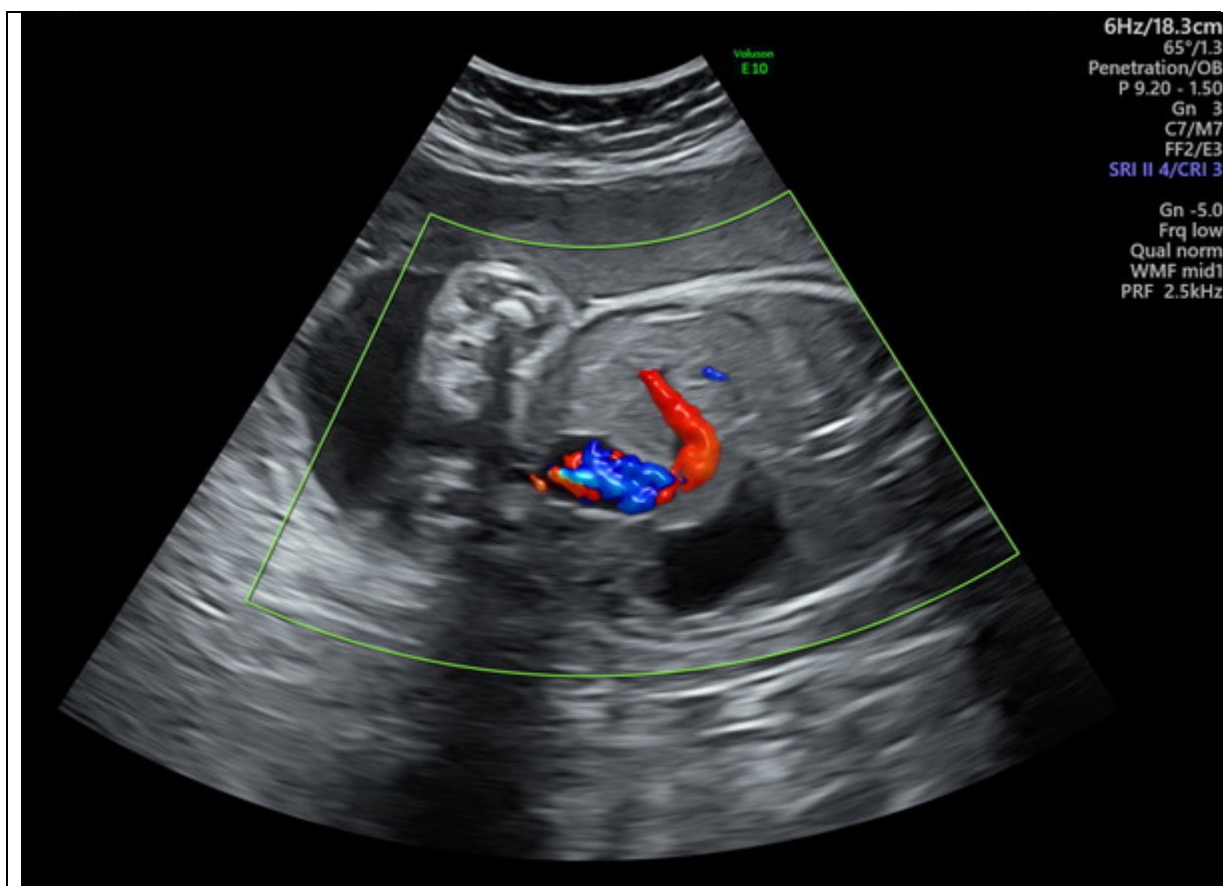

Figure S2. 3D imaging of varix cords

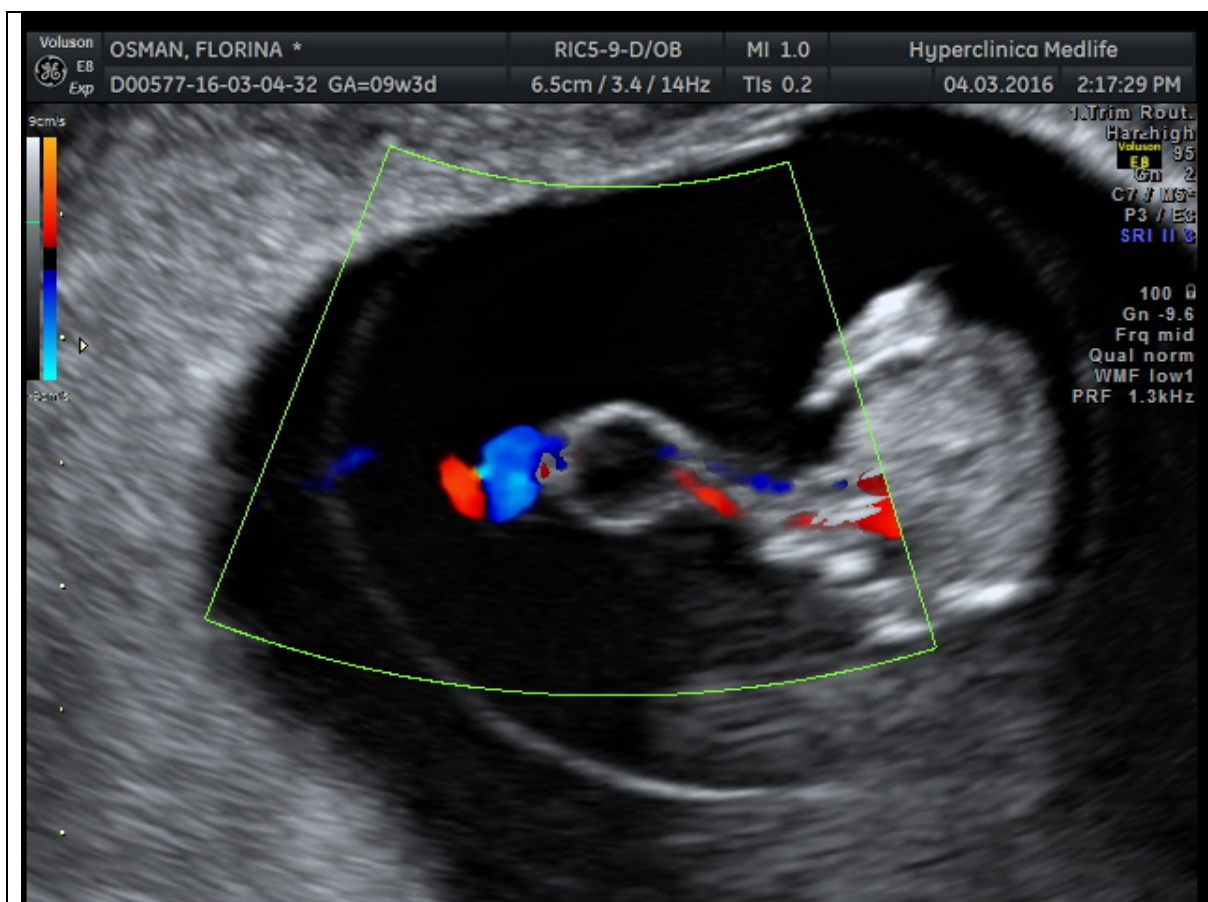

Figure S3. Cystic abnormalities

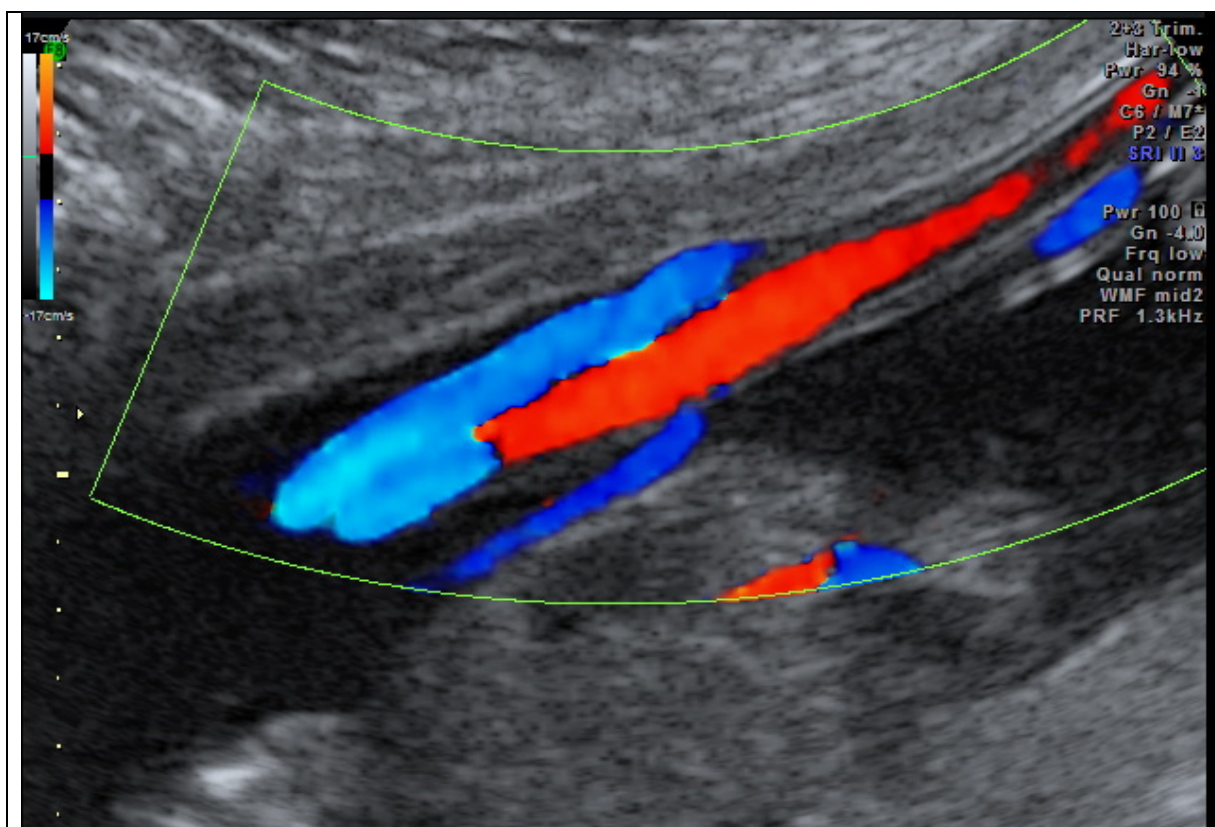

Figure S4. Coiling pathologies: lax cord
